# Supplementary material for: Biomimetic intrafibrillar silicification of collagen fibrils through a one-step collagen self-assembly/silicification approach
Source: Royal Society of Chemistry journal article supplement (doi:10.1039/c7ra02935g), 2017-01-01
Supplement: c7ra02935g1.pdf [file c7ra02935g1.pdf]

# Biomimetic Intrafibrillar Silicification of Collagen Fibrils through a One-step Collagen Self-assembly/Silicification Approach

*Changmin Hu<sup>b</sup>, Le Yu<sup>a</sup>, and Mei Wei<sup>a, b, \*</sup>*

Department of Materials Science and Engineering<sup>a</sup>, Institute of Materials Science<sup>b</sup>,  
University of Connecticut, Storrs, CT 06269, USA

Corresponding author: [\*] Prof. M. Wei

Department of Materials Science and Engineering, Institute of Materials Science,  
University of Connecticut, Storrs, CT 06269, USA

Tel: 860-486-5003

Fax: 860-486-4745

Email: [mei.wei@uconn.edu](mailto:mei.wei@uconn.edu)

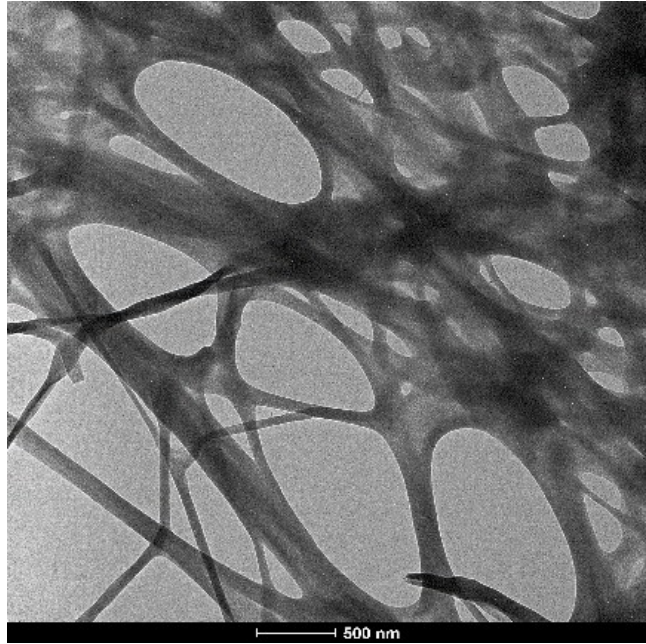

**Figure S1.** TEM image of collagen fibrils without mineralization.
